# Supplementary material for: A crab claw shaped molecular receptor for selective recognition of picric acid: supramolecular self-assembly mediated aggregation induced emission and color change
Source: Royal Society of Chemistry journal article supplement (doi:10.1039/c7ce00642j), 2017-01-01
Supplement: c7ce00642j1.pdf [file c7ce00642j1.pdf]

## Electronic Supplementary Information (ESI)

### **A Crab Claw Shaped Molecular Receptor for Selective Recognition of Picric Acid: Supramolecular Self-Assembly Mediated Aggregation Induced Emission and Color Change**

Jayaraman Pitchaimani,<sup>a#</sup> Anu Kundu,<sup>b#</sup> Subramanian Karthikeyan,<sup>c</sup> Savarimuthu Philip  
Anthony,<sup>b\*</sup> Dohyun Moon,<sup>c\*</sup> and Vedichi Madhu<sup>a\*</sup>

<sup>a</sup>School of Science & Humanities Department of Chemistry, Karunya University, Coimbatore-641 114, Tamil Nadu. E-mail: [madhu@karunya.edu](mailto:madhu@karunya.edu). Tel: +91 422-261-4483

<sup>b</sup>School of Chemical & Biotechnology, SASTRA University Thanjavur-613401, Tamil Nadu, India. E-mail: [philip@biotech.sastra.edu](mailto:philip@biotech.sastra.edu).

<sup>c</sup>International Research Centre, Kalasalingam University, Krishnan Kovil-626126, India.

<sup>d</sup>Beamline Department, Pohang Accelerator Laboratory 80 Jigokro-127 beongil Namgu, Pohang, Gyeongbuk, Korea. E-mail: [dmoon@postech.ac.kr](mailto:dmoon@postech.ac.kr).

## Experimental Section

**1.1 Materials and methods:** All other reagents and solvents were obtained from commercial suppliers (Aldrich, Alfa Aesar, and TCI Chemicals) and used as received; solvents were purified from appropriate drying agents when necessary. Absorption and fluorescence spectra were recorded using Perkin Elmer Lambda 1050 and Jasco Fluorescence spectrometer-FP-8200 instruments. FT-IR spectra were measured using a Shimadzu IR Affinity-1S spectrophotometer with KBr pellets. The solid state spectra of the samples were recorded on UV-VIS spectrophotometer (SHIMADZU 01174) with barium sulfate as the reference, equipped with a diffuse reflectance accessory. The measured reflectance spectra were converted to absorption using Kubelka-Munk equation. The structure and electronic properties of PyBAP, PyBAP-PA, and PyBAP-H have been investigated by using density functional theory (DFT) and time-dependent DFT (TDDFT). TD-DFT calculations have been performed using the B3PW91 exchange correlation functional, as implemented in the Gaussian03 program package. The 6-31+G(d, p) basis set was used for N, O, C and H.

**Caution!** Nitroexplosives viz. TNT, RDX and PA are highly explosive and should be handled sensibly in small amounts to prevent any explosion.

**1.2 Preparation of 2,6-Pyridine bis(iminoantipyrene) (PyBAP):** Schiff base have been synthesized by reflux the mixture of 4-aminoantipyrene (0.3g, 1.4 mmol) with 2,6-pyridinedicarboxaldehyde (0.1g, 0.7 mmol) in 15 mL ethanol for 2h. After completion the reaction the resulting mixture was filtered, washed with ethanol and dried in a vacuum. Yield (0.257g, 68%). <sup>1</sup>H NMR (300 MHz, CDCl<sub>3</sub>)  $\delta$  9.81 (s, 2H (imine)), 7.98 (d,  $J$  = 7.8 Hz, 2H), 7.78 (t,  $J$  = 7.8 Hz, 1H), 7.51-7.46 (m, 4H), 7.42-7.39 (m, 4H), 7.35-7.29 (m, 2H), 3.18 (s, 6H), 2.52 (s, 6H). IR (KBr):  $\nu$  = 2925(m), 1640(s), 1595(s), 1551(s), 1491(s), 1412(s), 1294(m), 1136(s), 956(m), 768(m), 698(m), 563(m).

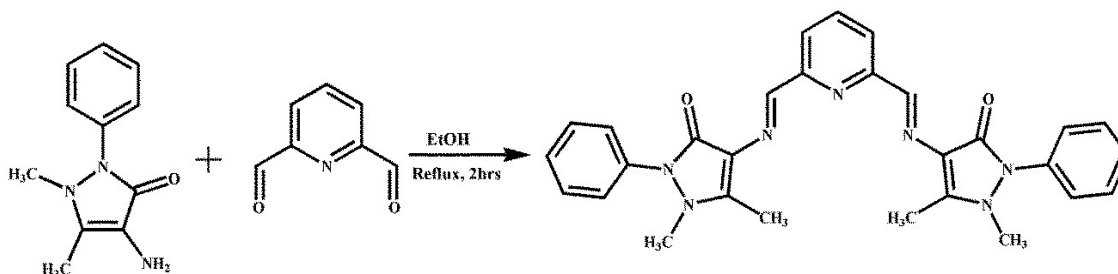

**Scheme S1.** Synthesis of molecular receptor 2,6-Pyridine bis(iminoantipyrene) (PyBAP).

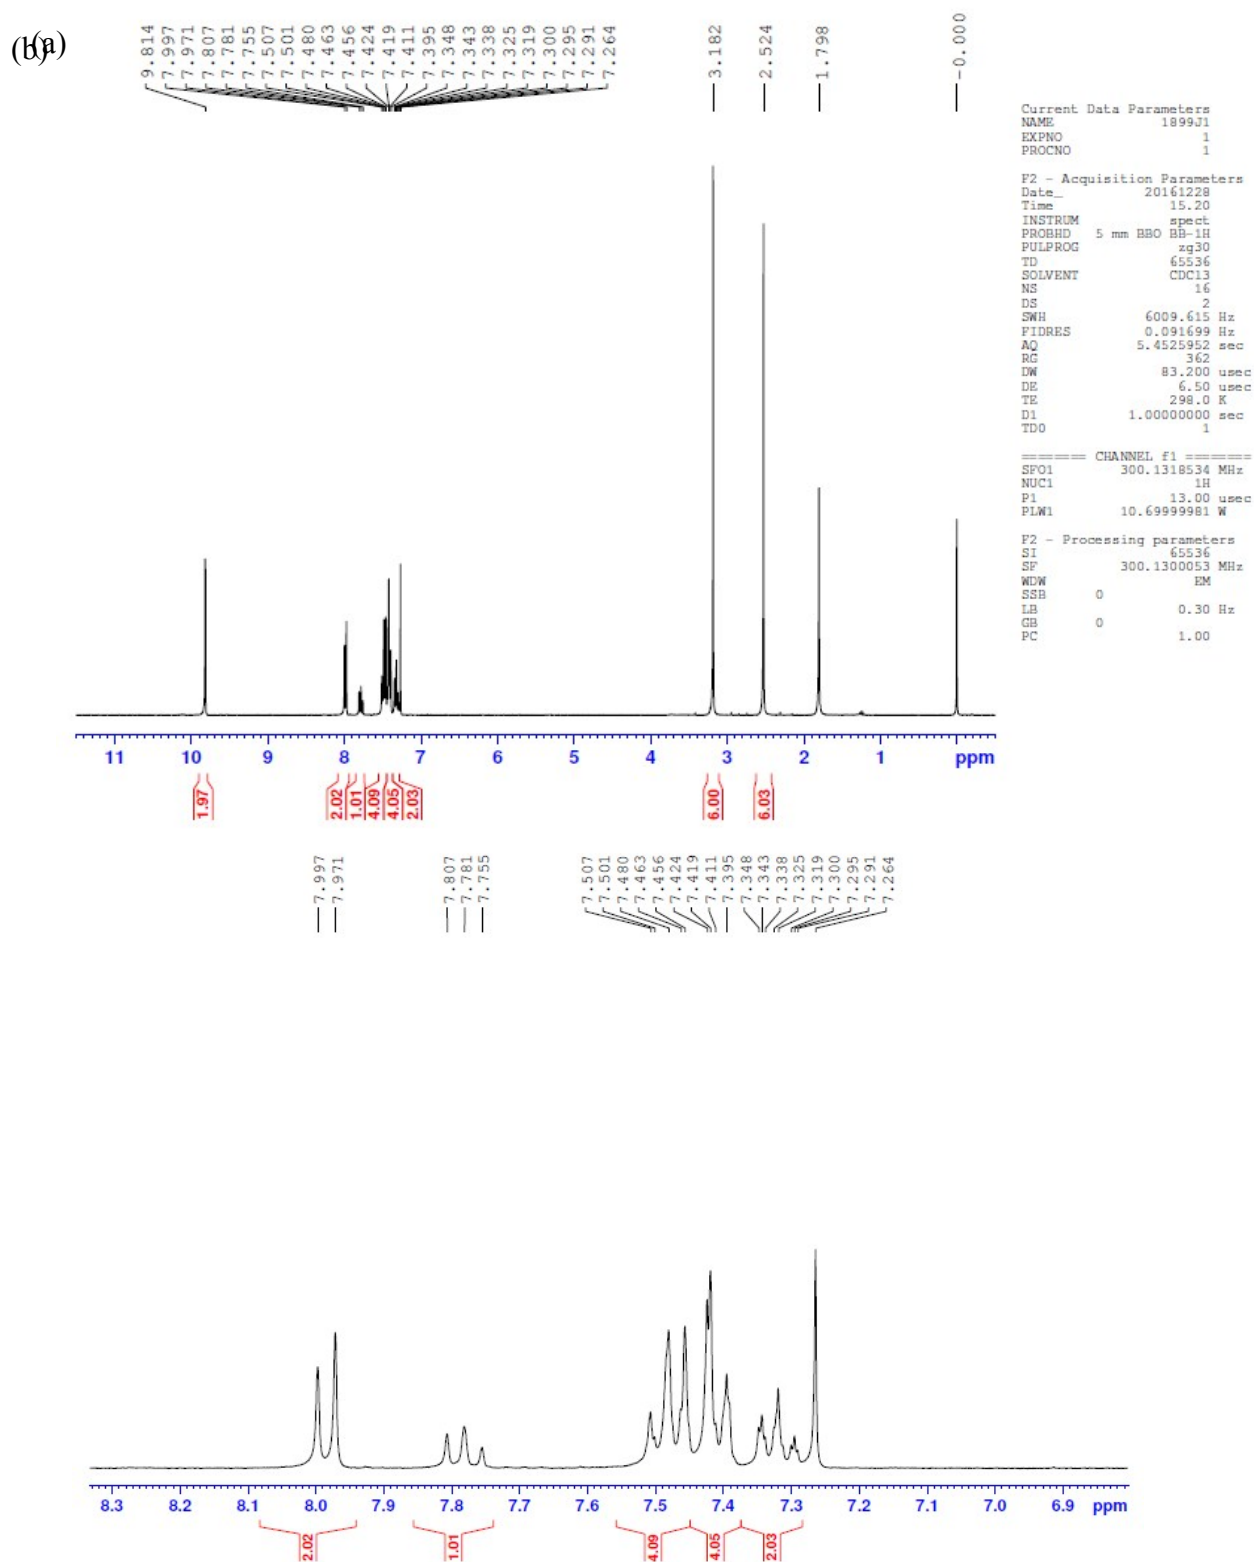

Fig. S1. (a)

$^1\text{H}$  NMR spectrum for compound PyBAP and (b) expanded in the mid-range.

**1.3 Preparation of PyBAP-PA:** PyBAP (0.03 g, 0.059 mmol) was dissolved in dichloromethane (5 mL) and picric acid (0.0135 g, 0.059 mmol) was added into the solution that converted the colorless solution to reddish-orange immediately. The solution was stirred further at RT for 5 min. Then, diethyl ether was allowed to diffuse in to the dichloromethane solution for 3 days. The formed red crystals were washed with diethyl ether and isolated carefully, Yield (0.040 g, 94 %).  $^1\text{H}$  NMR (300 MHz,  $\text{CDCl}_3$ )  $\delta$  9.69 (s, 2H (imine)), 8.82 (s, 2H), 8.29 (t,  $J = 7.8$  Hz, 1H), 7.90 (d,  $J = 7.8$  Hz, 2H), 7.53-7.48 (m, 4H), 7.44-7.39 (m, 2H), 7.33 (d,  $J = 7.5$  Hz, 4H), 3.39 (s, 6H), 2.58 (s, 6H). IR spectrum (KBr)  $\nu = 3088(\text{m})$ ,  $1650(\text{m})$ ,  $1610(\text{s})$ ,  $1497(\text{s})$ ,  $1397(\text{s})$ ,  $1297(\text{s})$ ,  $1150(\text{s})$ ,  $1061(\text{m})$ ,  $751(\text{m})$ ,  $697(\text{m})$ .

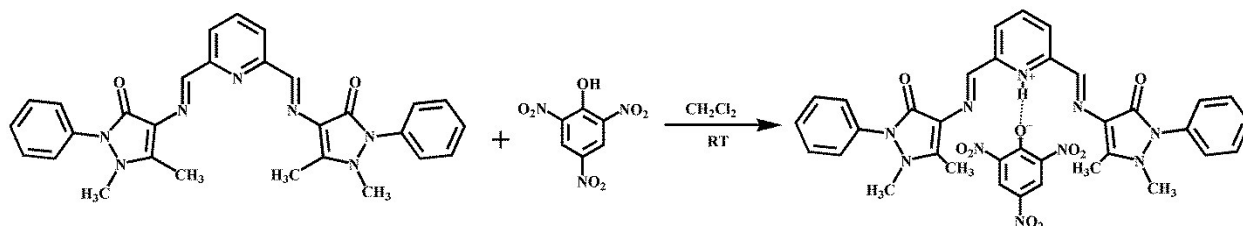

**Scheme S2.** Synthesis of host-guest complex PyBAP-PA.

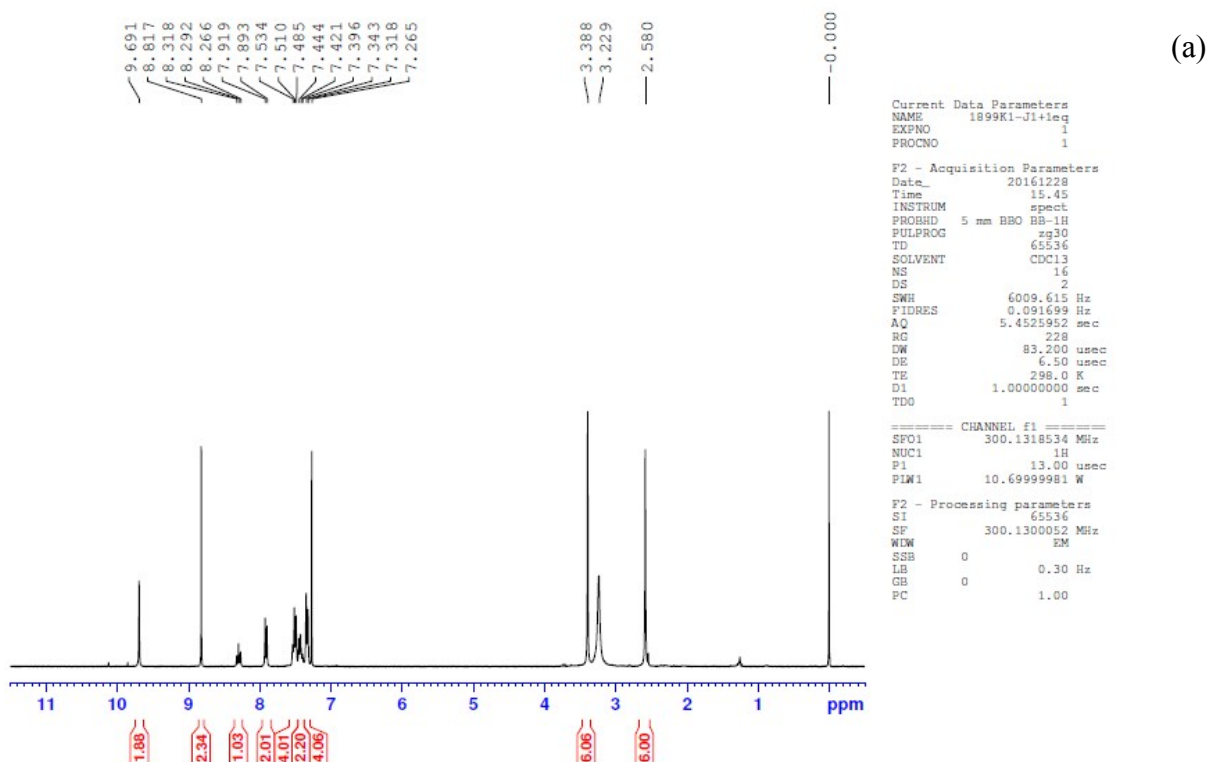

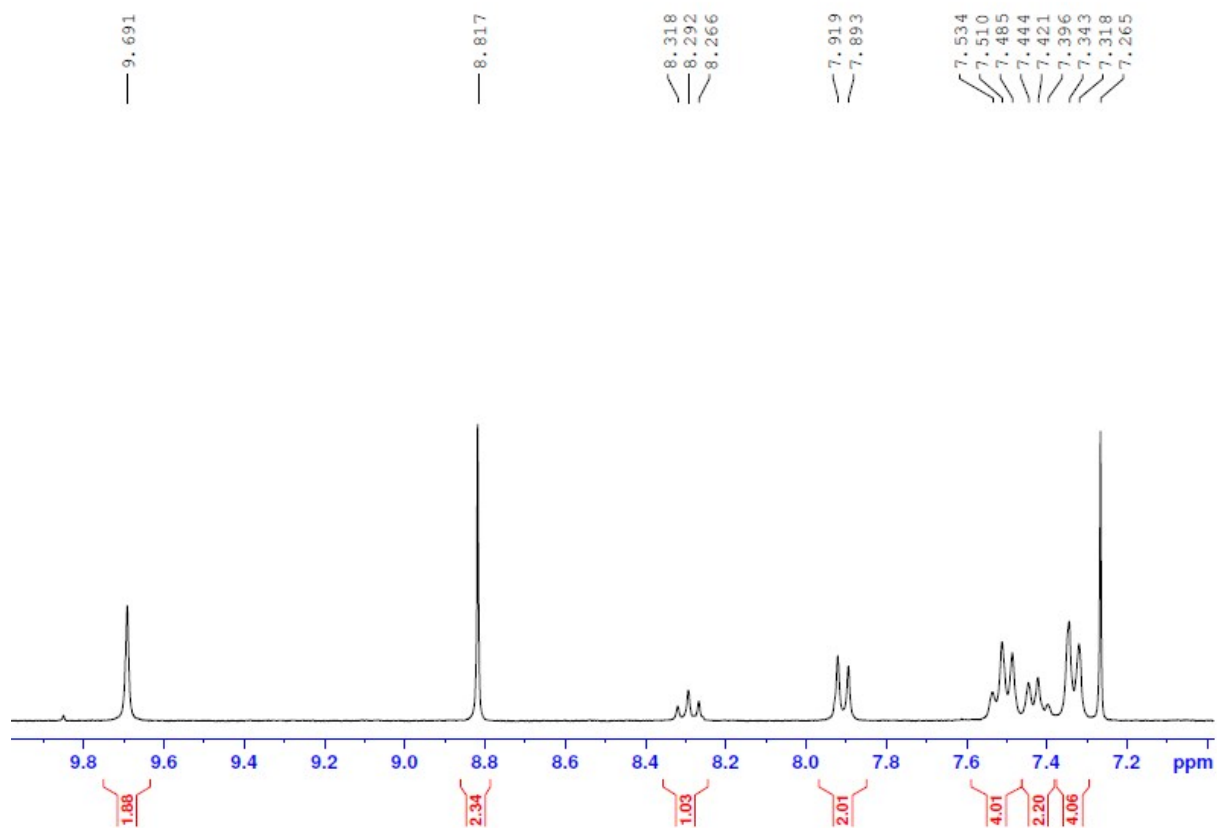

**Fig. S2.** (a)  $^1\text{H}$  NMR spectrum for compound PyBAP-PA and (b) expanded in the mid-range.

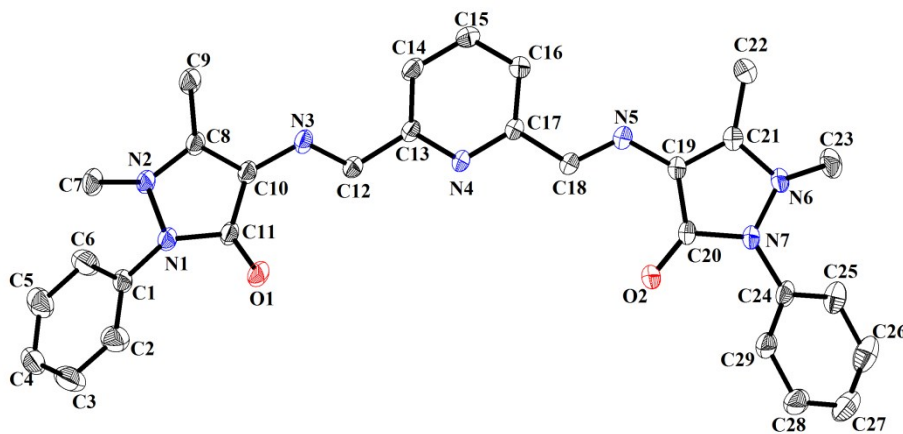

**Fig. S3** ORTEP diagram of PyBAP with 50% probability ellipsoid with atom label. H-atoms are omitted for clarity. Color code: carbon - grey, oxygen - red, nitrogen – blue.

**Table S1.** Crystal data and structure refinement for PyBAP (CCDC 1534731)

|                                                     |                                                               |                              |
|-----------------------------------------------------|---------------------------------------------------------------|------------------------------|
| Identification code                                 | SPA157                                                        |                              |
| Empirical formula                                   | C <sub>29</sub> H <sub>27</sub> N <sub>7</sub> O <sub>2</sub> |                              |
| Formula weight                                      | 505.57                                                        |                              |
| Temperature                                         | 173(2) K                                                      |                              |
| Wavelength                                          | 0.610 Å                                                       |                              |
| Crystal system                                      | Monoclinic                                                    |                              |
| Space group                                         | <i>P</i> 2 <sub>1</sub> / <i>n</i>                            |                              |
| Unit cell dimensions                                | <i>a</i> = 9.307(2) Å                                         | $\alpha = 90^\circ$ .        |
|                                                     | <i>b</i> = 21.037(2) Å                                        | $\beta = 101.561(3)^\circ$ . |
|                                                     | <i>c</i> = 13.607(2) Å                                        | $\gamma = 90^\circ$ .        |
| Volume                                              | 2610.1(7) Å <sup>3</sup>                                      |                              |
| <i>Z</i>                                            | 4                                                             |                              |
| Density (calculated)                                | 1.287 Mg/m <sup>3</sup>                                       |                              |
| Absorption coefficient                              | 0.062 mm <sup>-1</sup>                                        |                              |
| <i>F</i> (000)                                      | 1064                                                          |                              |
| Crystal size                                        | 0.325 x 0.311 x 0.295 mm <sup>3</sup>                         |                              |
| Theta range for data collection                     | 1.552 to 25.000°.                                             |                              |
| Index ranges                                        | -12 ≤ <i>h</i> ≤ 12, -29 ≤ <i>k</i> ≤ 29, -18 ≤ <i>l</i> ≤ 18 |                              |
| Reflections collected                               | 14320                                                         |                              |
| Independent reflections                             | 7258 [ <i>R</i> (int) = 0.0240]                               |                              |
| Completeness to theta = 21.469°                     | 99.9 %                                                        |                              |
| Absorption correction                               | Empirical                                                     |                              |
| Max. and min. transmission                          | 1.000 and 0.860                                               |                              |
| Refinement method                                   | Full-matrix least-squares on <i>F</i> <sup>2</sup>            |                              |
| Data / restraints / parameters                      | 7258 / 0 / 348                                                |                              |
| Goodness-of-fit on <i>F</i> <sup>2</sup>            | 1.008                                                         |                              |
| Final <i>R</i> indices [ <i>I</i> > 2σ( <i>I</i> )] | <i>R</i> 1 = 0.0420, <i>wR</i> 2 = 0.1120                     |                              |
| <i>R</i> indices (all data)                         | <i>R</i> 1 = 0.0594, <i>wR</i> 2 = 0.1193                     |                              |
| Extinction coefficient                              | 0.038(3)                                                      |                              |
| Largest diff. peak and hole                         | 0.379 and -0.218 e.Å <sup>-3</sup>                            |                              |

---

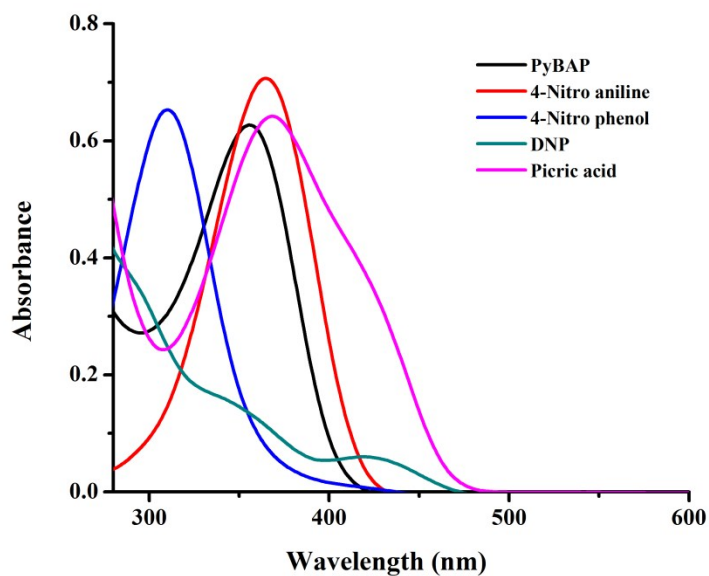

**Fig. S4** Absorption spectra of PyBAP and different nitroaromatic compounds ( $10^{-3}$  M).

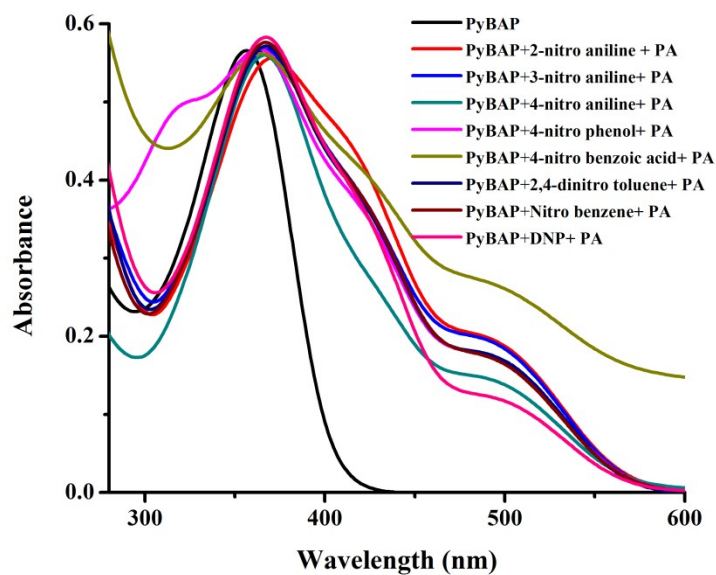

**Fig. S5** Absorption spectra of PyBAP ( $10^{-3}$  M) with different aromatic aniline and picric acid ( $10^{-3}$  M).

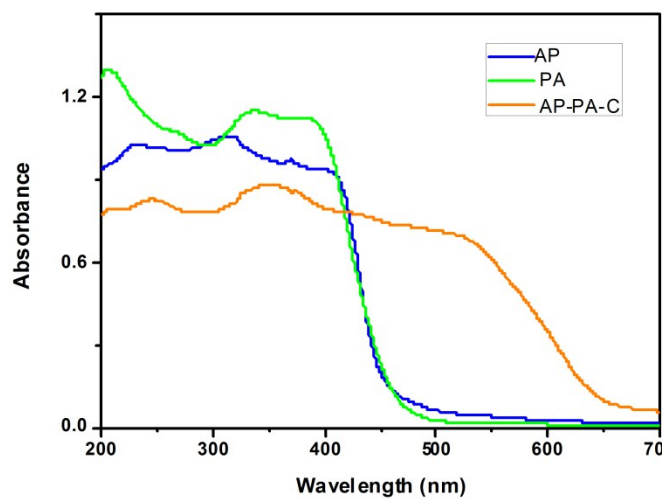

**Fig. S6** Solid state absorption spectra of PyBAP, PA and PyBAP-PA

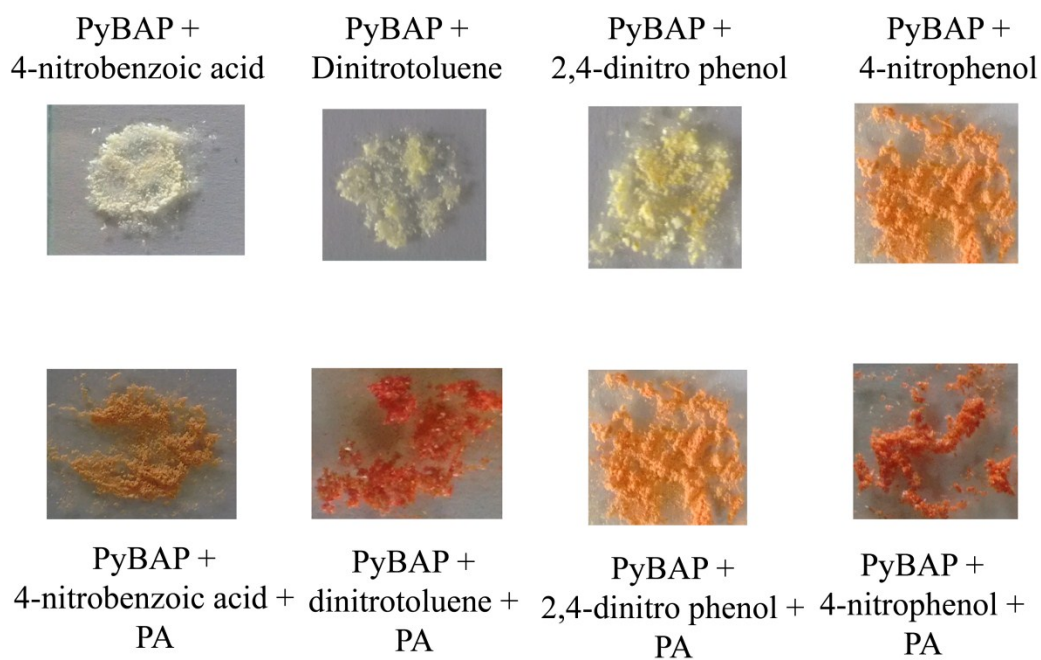

**Fig. S7** Digital images: Color NACs with PyBAP receptor (top row). Color of NACs with PyBAP in the presence of PA (bottom row).

**Table S2.** Crystal data and structure refinement for PyBAP-PA (CCDC 1534730)

|                                                     |                                                                |                             |
|-----------------------------------------------------|----------------------------------------------------------------|-----------------------------|
| Identification code                                 | SPA156                                                         |                             |
| Empirical formula                                   | C <sub>35</sub> H <sub>30</sub> N <sub>10</sub> O <sub>9</sub> |                             |
| Formula weight                                      | 734.69                                                         |                             |
| Temperature                                         | 173(2) K                                                       |                             |
| Wavelength                                          | 0.630 Å                                                        |                             |
| Crystal system                                      | Monoclinic                                                     |                             |
| Space group                                         | <i>P</i> 2 <sub>1</sub> / <i>c</i>                             |                             |
| Unit cell dimensions                                | <i>a</i> = 10.689(2) Å                                         | $\alpha = 90^\circ$ .       |
|                                                     | <i>b</i> = 21.090(3) Å                                         | $\beta = 93.045(4)^\circ$ . |
|                                                     | <i>c</i> = 15.168(2) Å                                         | $\gamma = 90^\circ$ .       |
| Volume                                              | 3414.5(9) Å <sup>3</sup>                                       |                             |
| <i>Z</i>                                            | 4                                                              |                             |
| Density (calculated)                                | 1.429 Mg/m <sup>3</sup>                                        |                             |
| Absorption coefficient                              | 0.082 mm <sup>-1</sup>                                         |                             |
| <i>F</i> (000)                                      | 1528                                                           |                             |
| Crystal size                                        | 0.112 x 0.095 x 0.085 mm <sup>3</sup>                          |                             |
| Theta range for data collection                     | 1.467 to 25.999°.                                              |                             |
| Index ranges                                        | -14 ≤ <i>h</i> ≤ 14, -29 ≤ <i>k</i> ≤ 29, -21 ≤ <i>l</i> ≤ 21  |                             |
| Reflections collected                               | 18995                                                          |                             |
| Independent reflections                             | 9628 [ <i>R</i> (int) = 0.0355]                                |                             |
| Completeness to theta = 22.210°                     | 99.7 %                                                         |                             |
| Absorption correction                               | Empirical                                                      |                             |
| Max. and min. transmission                          | 1.000 and 0.836                                                |                             |
| Refinement method                                   | Full-matrix least-squares on <i>F</i> <sup>2</sup>             |                             |
| Data / restraints / parameters                      | 9620 / 12 / 493                                                |                             |
| Goodness-of-fit on <i>F</i> <sup>2</sup>            | 0.992                                                          |                             |
| Final <i>R</i> indices [ <i>I</i> > 2σ( <i>I</i> )] | <i>R</i> 1 = 0.0629, <i>wR</i> 2 = 0.2287                      |                             |
| <i>R</i> indices (all data)                         | <i>R</i> 1 = 0.1139, <i>wR</i> 2 = 0.2541                      |                             |
| Extinction coefficient                              | 0.037(4)                                                       |                             |
| Largest diff. peak and hole                         | 1.004 and -0.639 e.Å <sup>-3</sup>                             |                             |

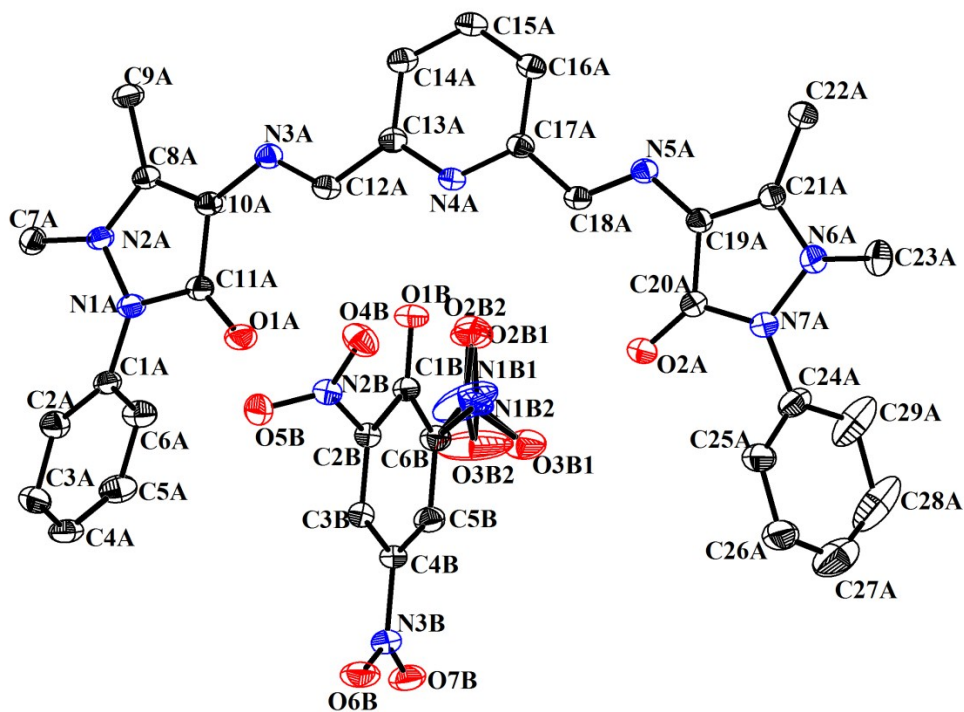

**Fig. S8** ORTEP diagram of PyBAP-PA with 30% probability ellipsoid with atom label. H-atoms are omitted for clarity. Color code: carbon - grey, oxygen - red, nitrogen – blue.

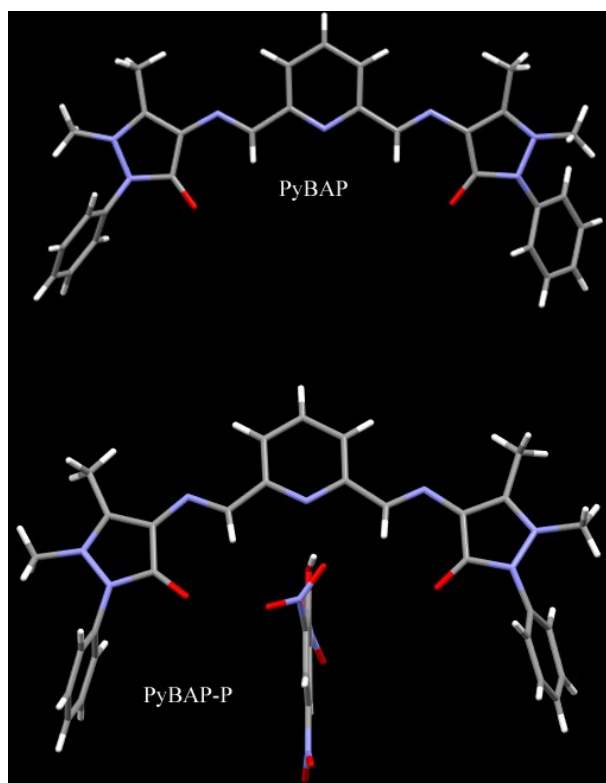

**Fig. S9.** Molecular structure of PYBAP and PYBAP-PA in a crystal lattice.

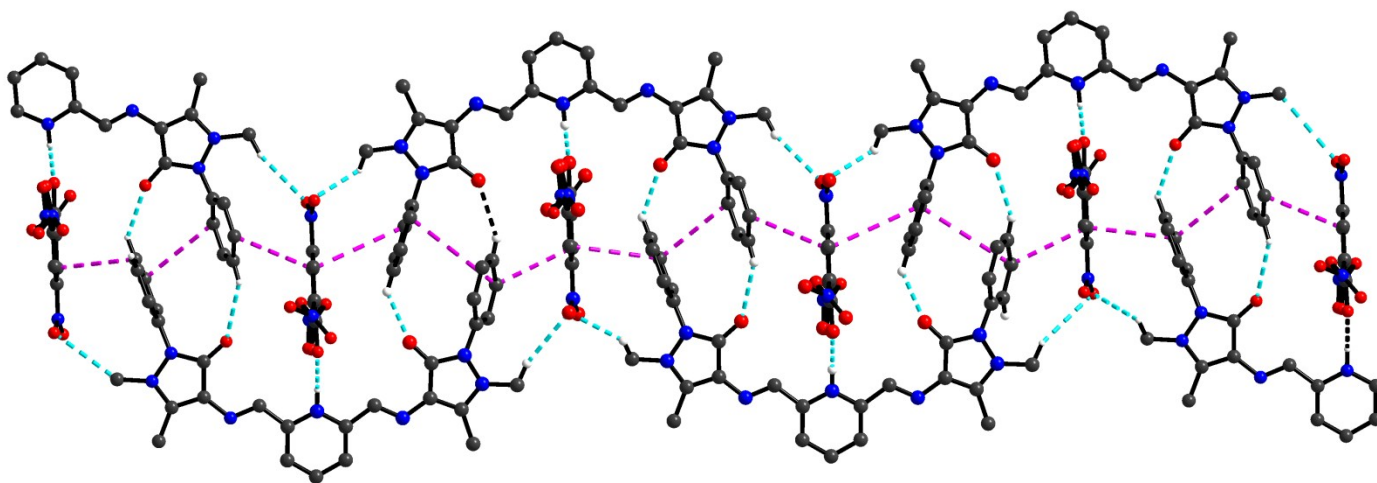

**Fig. S10.** The hydrogen-bond and  $\pi$ - $\pi$  interactions in PyBAP-PA complex (hydrogen-bond=cyan line;  $\pi$ - $\pi$  interaction=purple line). Some hydrogen atoms are omitted for clarity.

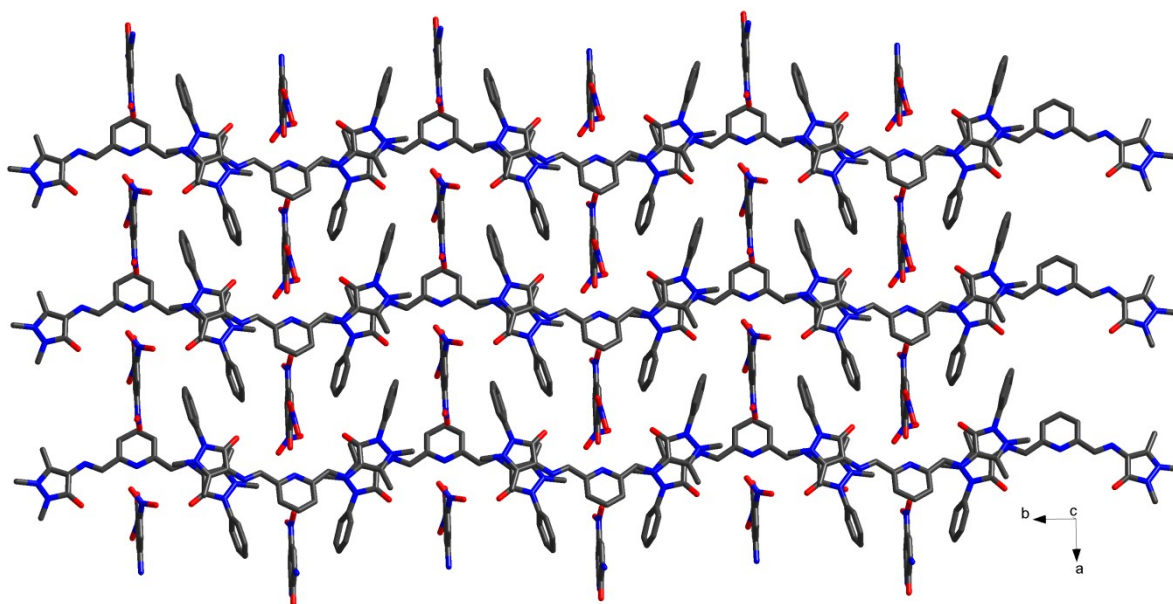

**Fig. S11.** The antipyrine phenyl group of PyBAP molecules are interdigitated between PA and PyBAP antipyrine phenyl along c-axis

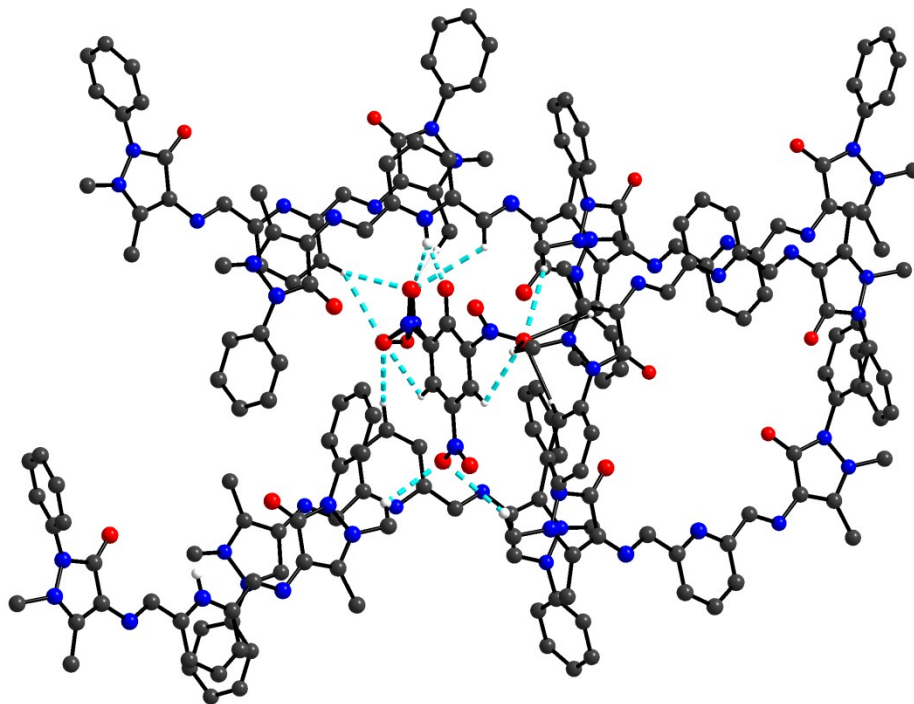

**Fig. S12** Hydrogen bonding interaction between one PA and seven PyBAP receptor.

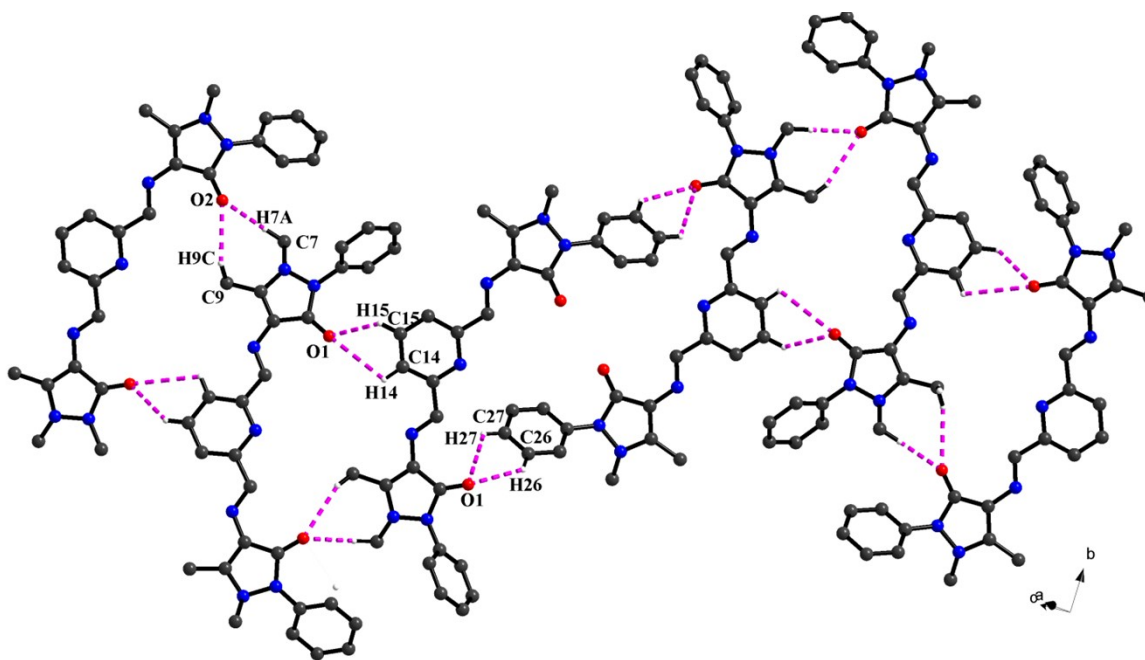

**Fig. S13** C–H $\cdots$ O hydrogen-bonding interactions in PyBAP crystal lattice (the hydrogen-bond interactions are indicated with purple lines). Selected D–H $\cdots$ A and D $\cdots$ A distances: C26–H26 $\cdots$ O1=2.760(2) Å, C26 $\cdots$ O1=3.497(1) Å, C27–H27 $\cdots$ O1=3.112(2) Å, C27 $\cdots$ O1=3.667(1) Å, C14–H14 $\cdots$ O1=3.105(4) Å, C14 $\cdots$ O1=3.534(5) Å, C15–H15 $\cdots$ O1=2.501(1) Å, C15 $\cdots$ O1=3.238(3) Å, C17–H7A $\cdots$ O2=2.329(3) Å, C7 $\cdots$ O2=3.287(5) Å, C9–H9C $\cdots$ O2=2.621(0) Å, C9 $\cdots$ O2=3.471(1) Å.

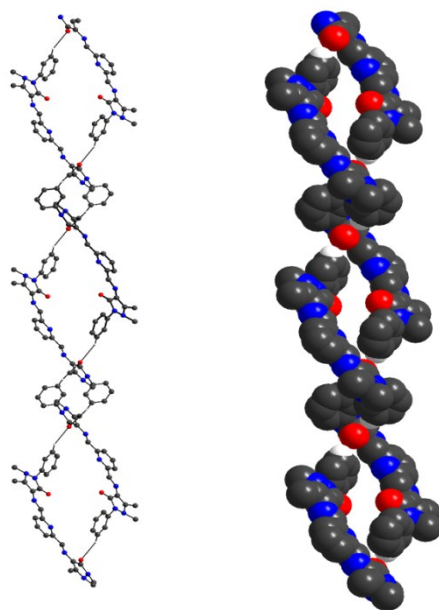

**Fig. S14** Crystal packing of PyBAP showing the helical arrangement due to C–H $\cdots$ O hydrogen-bonding interactions.

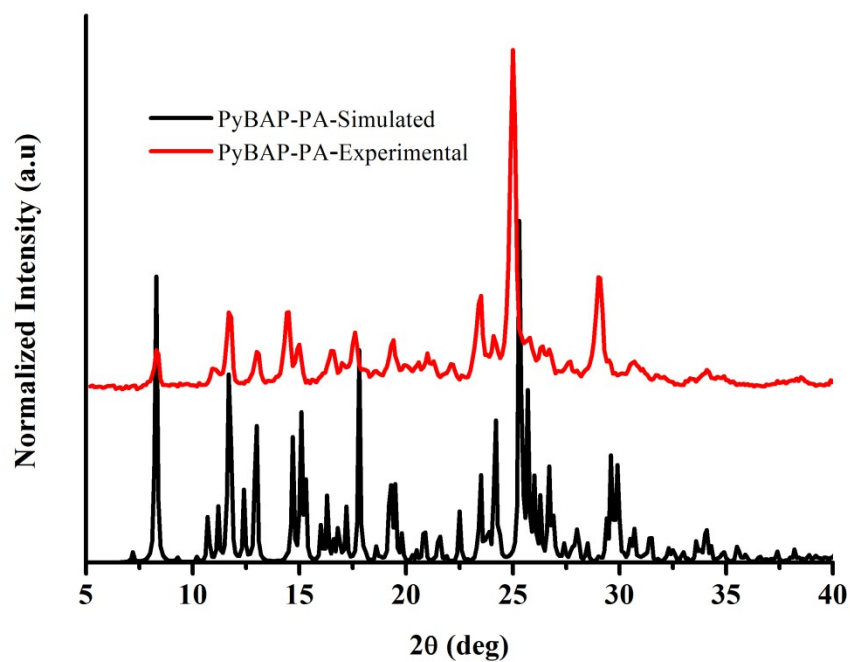

**Fig. S15.** Experimental and simulated PXR D pattern of PyBAP-PA.

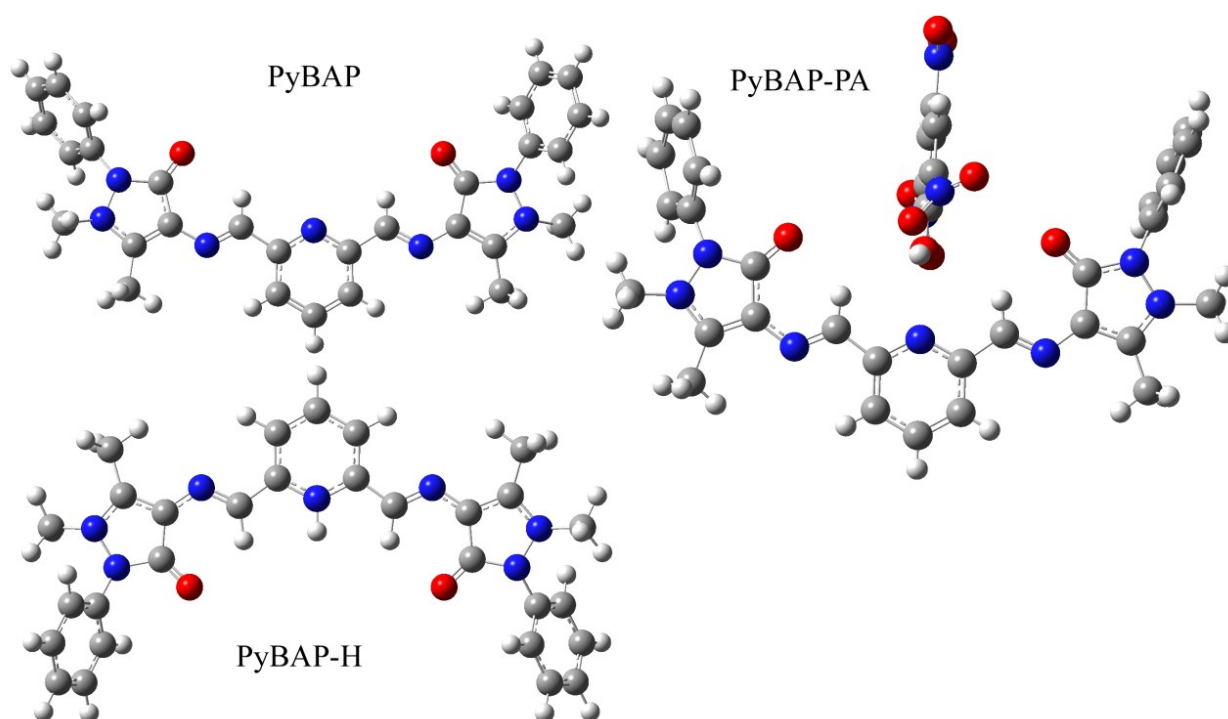

**Fig. S16.** Optimized structure of PyBAP, PyBAP-PA and PyBAP-H.

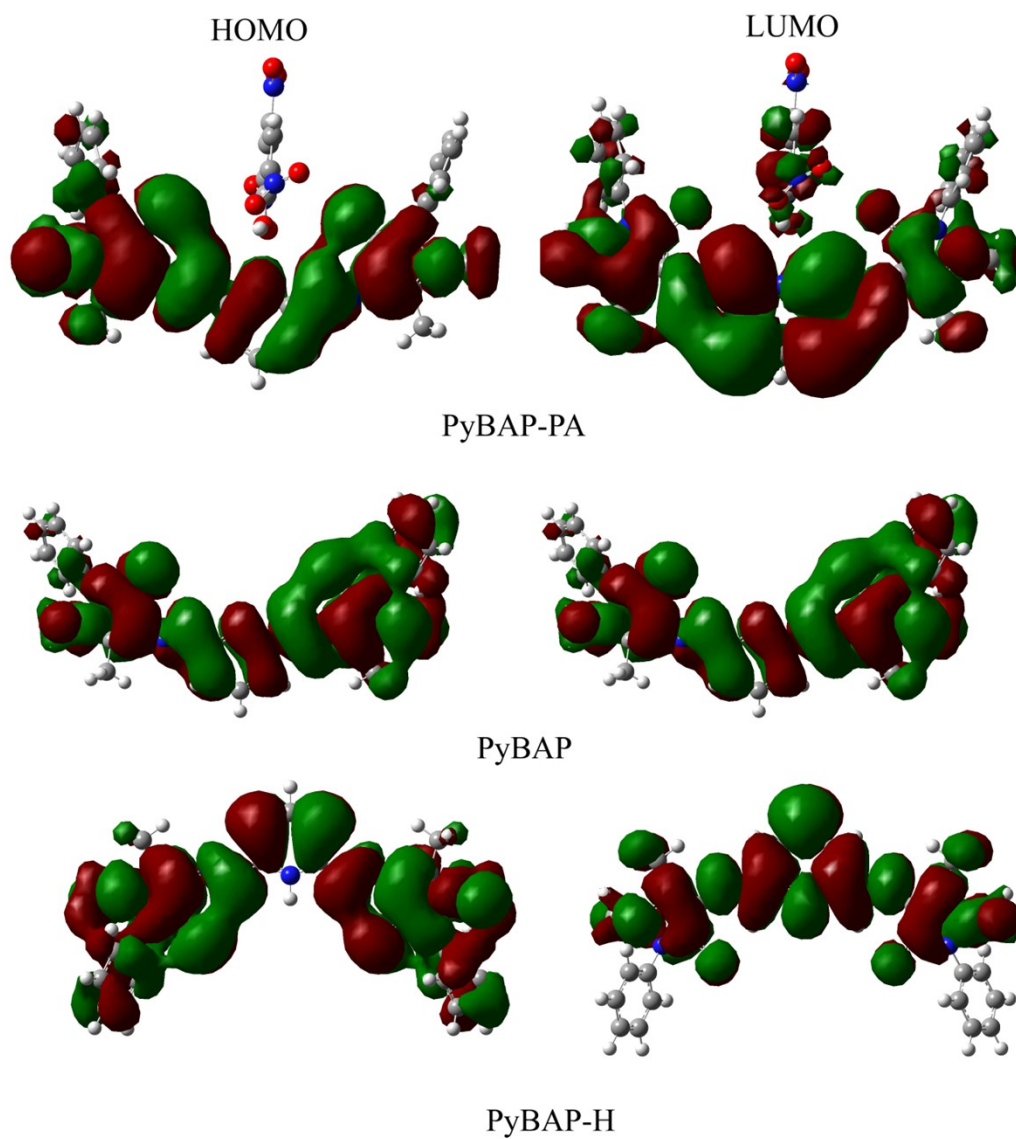

**Fig. S17.** Molecular orbital plots of the HOMOs and LUMOs of PyBAP-PA, PyBAP and PyBAP-H.

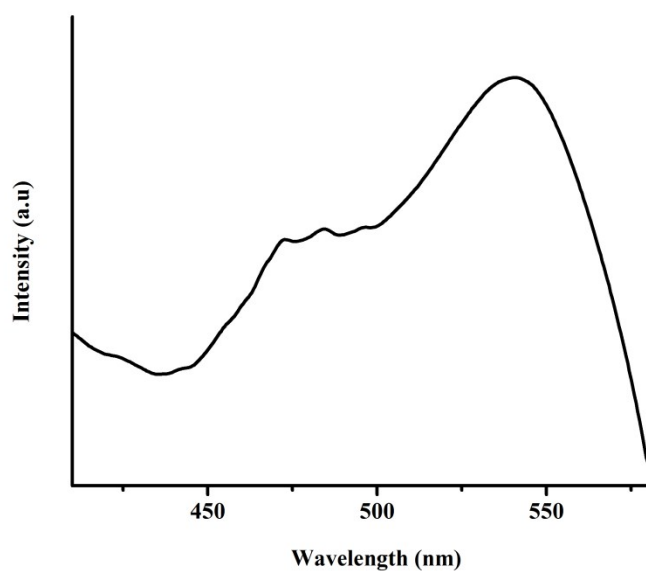

**Fig. S18.** The excitation spectra of PyBAP-PA.

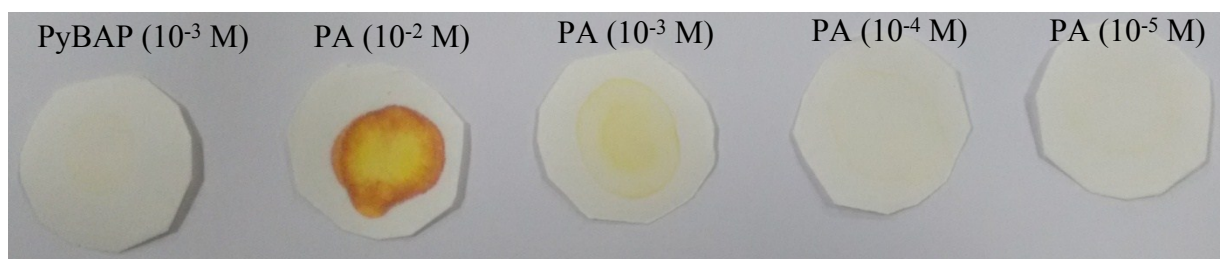

**Fig. S19.** PyBAP paper strip dipped in different concentration of PA solution.
